# Supplementary material for: Semi-automatic instrumentation for nucleic acid extraction and purification to quantify pathogens on surfaces
Source: Royal Society of Chemistry journal article supplement (doi:10.1039/c9an00896a), 2019-01-01
Supplement: c9an00896a1.pdf [file c9an00896a1.pdf]

## **Electronic Supplementary Material**

### **Semi-automatic Instrumentation for the nucleic acid extraction and purification to quantify pathogen on the surface**

*Won-Nyoung Lee, Hyun Jin Yoo, Kim Huyen Nguyen, Changyoon Baek\*, and Junhong Min\**

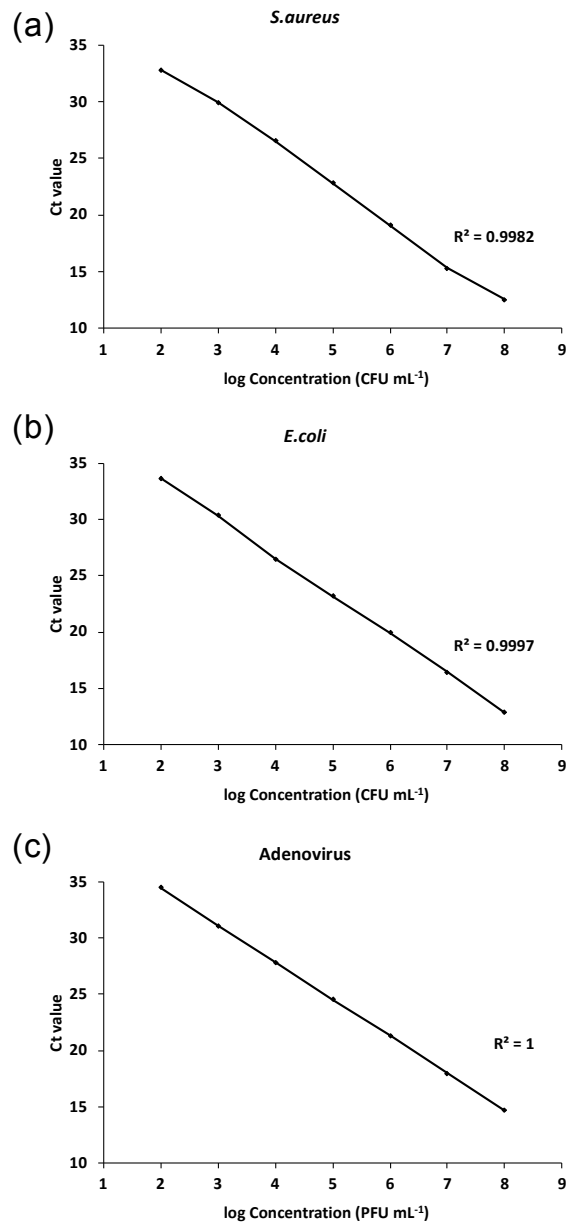

**Fig. S1.** Typical calibration curve for Real-Time PCR of (a) *Staphylococcus aureus*, (b) *Escherichia coli*, (c) Adenovirus.

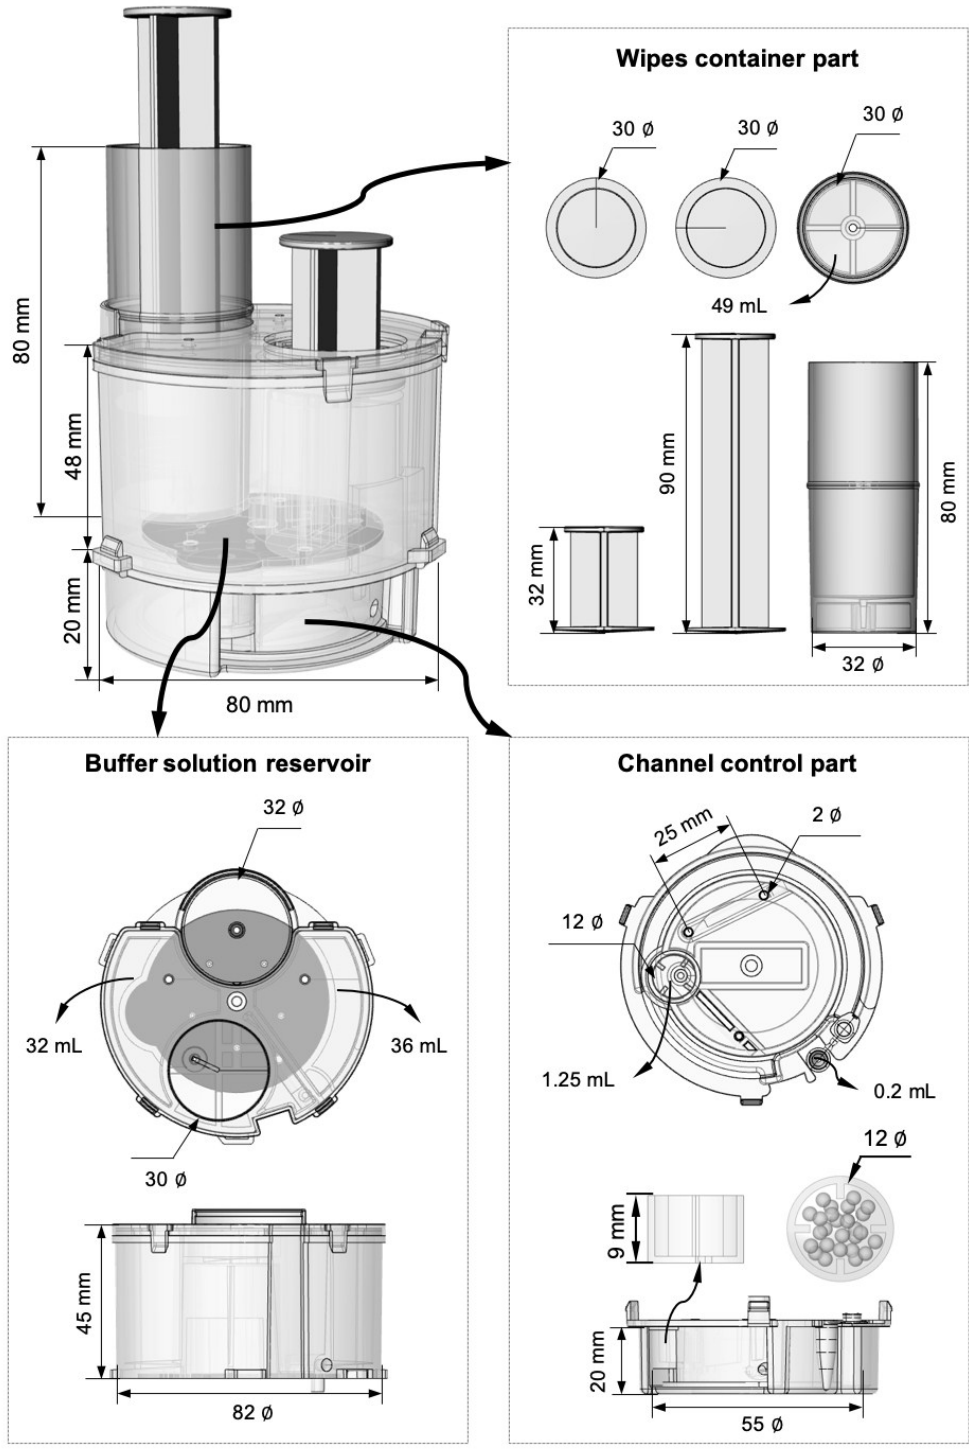

Fig.S2. Design of cartridge for PCR compatible surface sampling tool.

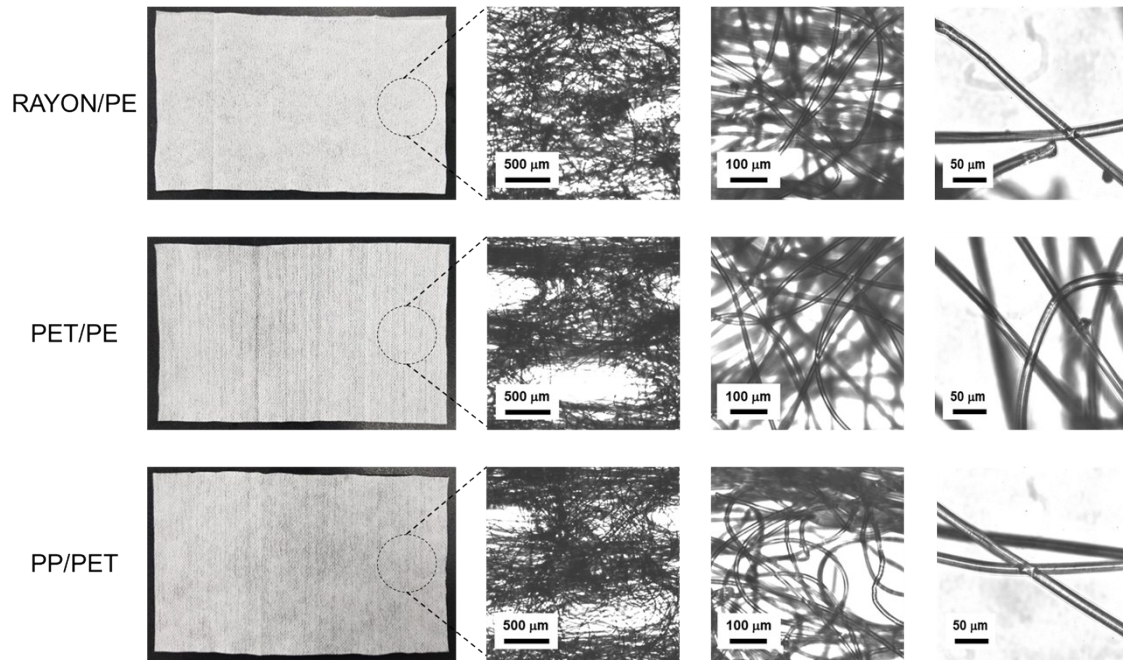

**Fig.S3.** Morphological structures of various wipers by bright-field microscope image.

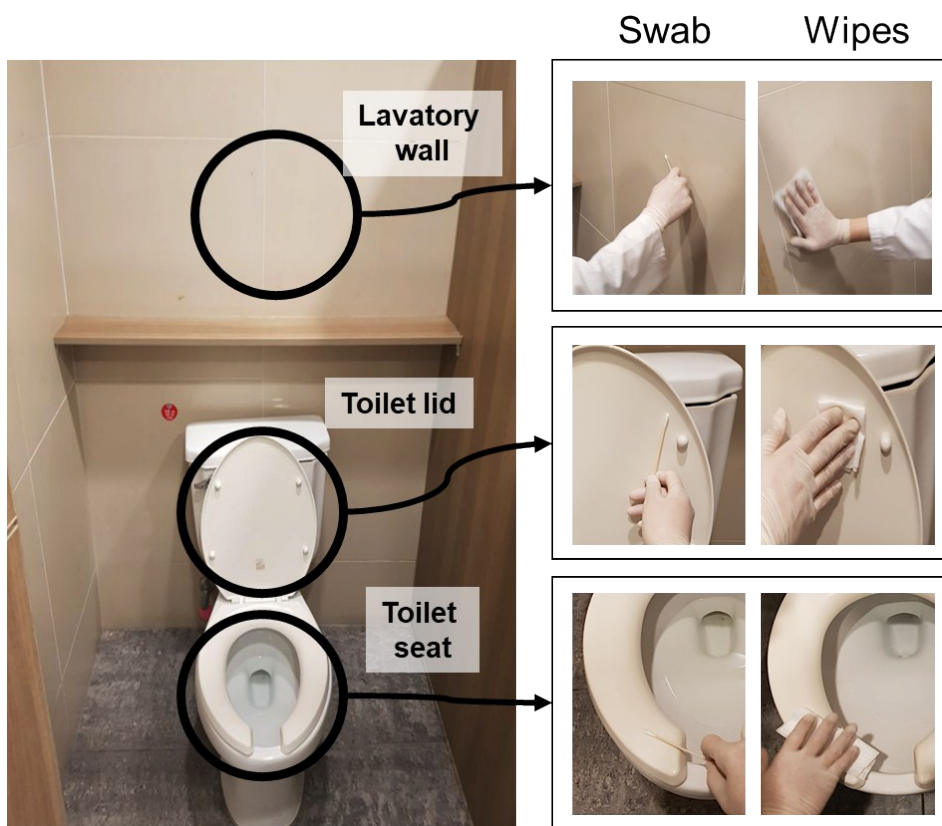

**Fig.S4.** Various surface measurements of lavatory for performance testing.

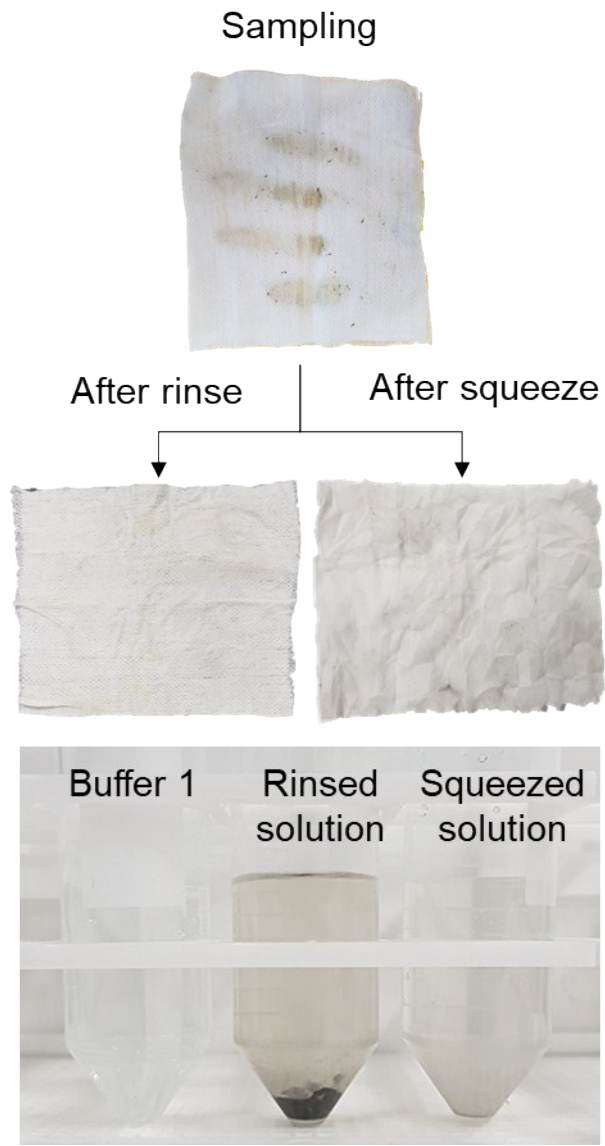

**Fig.S5.** Images of solution turbidity according to dust removal methods; After rinse: soak wipes in buffer 1 and rinse, After squeeze: soak wipes in buffer 1 and squeeze.
